# Supplementary material for: Extraction mechanism and γ-radiation effect on the removal of Eu3+ by a novel BTPhen/[Cnmim][NTf2] system in the presence of nitric acid
Source: Royal Society of Chemistry journal article supplement (doi:10.1039/c4ra07662a), 2014-01-01
Supplement: c4ra07662a1.pdf [file c4ra07662a1.pdf]

## Supporting Information

### Extraction mechanism and $\gamma$ -radiation effect on the removal of $\text{Eu}^{3+}$ by a novel BTPhen/ $[\text{C}_n\text{mim}][\text{NTf}_2]$ system in the presence of nitric acid

Hanyang Zhou,<sup>‡</sup> Yinyong Ao,<sup>‡</sup> Jie Yuan, Jing Peng,<sup>\*</sup> Jiuqiang Li and Maolin Zhai<sup>\*</sup>

<sup>1</sup> Beijing National Laboratory for Molecular Sciences (BNLMS), Radiochemistry and Radiation Chemistry Key Laboratory of Fundamental Science, Department of Applied Chemistry, College of Chemistry and Molecular Engineering, Peking University, Beijing 100871, China

<sup>‡</sup> These authors contributed equally.

<sup>\*</sup> Corresponding authors: Tel/Fax: 86-10-62757193, 86-10-62753794,

E-mail: jpeng@pku.edu.cn, mlzhai@pku.edu.cn

| Page No. | Contents                                                                                                                                |
|----------|-----------------------------------------------------------------------------------------------------------------------------------------|
| S – 2    | Fig. S1 Influence of the oscillation time on $E_{\text{Eu}}$ in BTPhen/ $[\text{C}_2\text{mim}][\text{NTf}_2]$ system.                  |
| S – 3    | Table S1. $D_{\text{Eu}}$ in BTPhen/ $[\text{C}_n\text{mim}][\text{NTf}_2]$ systems depending on the initial nitric acid concentration. |
| S – 4    | Table S2. $D_{\text{Eu}}$ in BTPhen/1-octanol system depending on the initial nitric acid concentration.                                |
| S – 5    | Fig. S2 $^1\text{H}$ NMR spectra of BTPhen before and after irradiation.                                                                |
| S – 6    | Fig. S3 Micro-FTIR spectra of BTPhen before and after irradiation..                                                                     |
| S – 7    | Fig. S4 Influence of $\gamma$ -radiation on the $D_{\text{Eu}}$ in BTPhen/1-octanol system.                                             |
| S – 8    | Fig. S5 $^{19}\text{F}$ NMR spectra of $[\text{C}_2\text{mim}][\text{NTf}_2]$ before and after irradiation.                             |
| S – 9    | Table S3. Core level binding energy for sediment, $\text{Eu}_2(\text{SO}_3)_3$ and $\text{EuF}_3$                                       |

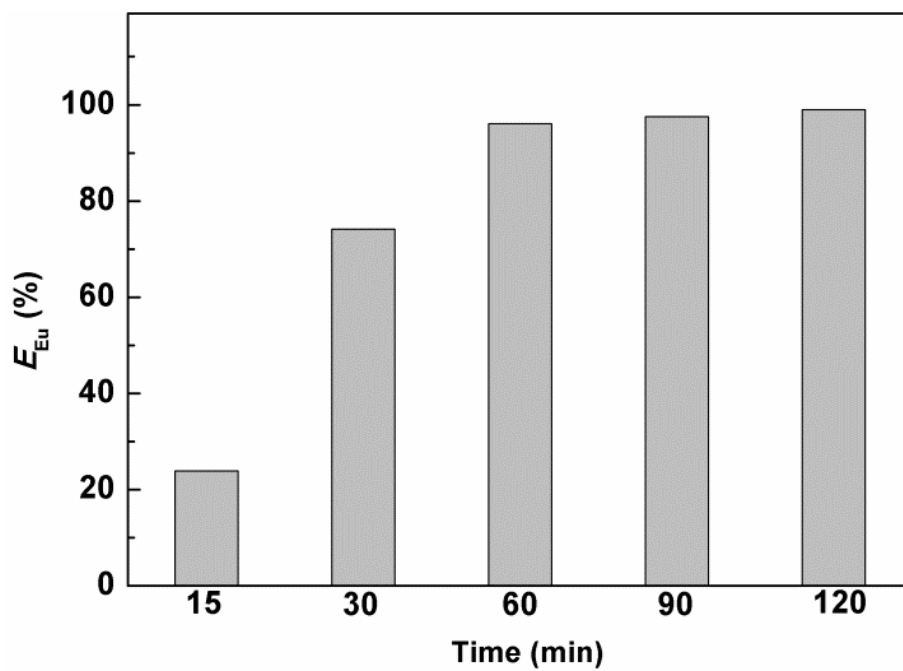

Fig. S1 Influence of the oscillation time on  $E_{Eu}$  in BTPHEN/[C<sub>2</sub>mim][NTf<sub>2</sub>] system. Initial nitric acid concentration: 0.1 M.

Table S1.  $D_{Eu}$  in BTPPhen/[C<sub>n</sub>mim][NTf<sub>2</sub>] systems depending on the initial nitric acid concentration.

| [HNO <sub>3</sub> ] (mol L <sup>-1</sup> ) | $D_{Eu}$                                |                                         |                                         |
|--------------------------------------------|-----------------------------------------|-----------------------------------------|-----------------------------------------|
|                                            | [C <sub>2</sub> mim][NTf <sub>2</sub> ] | [C <sub>4</sub> mim][NTf <sub>2</sub> ] | [C <sub>8</sub> mim][NTf <sub>2</sub> ] |
| 0.01                                       | 52                                      | 21                                      | 0.55                                    |
| 0.05                                       | 4.7                                     | 1.0                                     | 0.32                                    |
| 0.1                                        | 1.9                                     | 0.34                                    | 0.23                                    |
| 0.5                                        | 0.80                                    | 0.07                                    | 0.02                                    |
| 1                                          | 0.55                                    | 0.06                                    | 0.04                                    |
| 2                                          | 0.33                                    | 0.07                                    | 0.05                                    |
| 3                                          | 0.40                                    | 0.12                                    | 0.06                                    |

Table S2.  $D_{\text{Eu}}$  in BTPPhen/1-octanol system depending on the initial nitric acid concentration.

| $[\text{HNO}_3]$ (mol $\text{L}^{-1}$ ) | $D_{\text{Eu}}$ |
|-----------------------------------------|-----------------|
| <b>0.1</b>                              | <b>0.56</b>     |
| <b>1</b>                                | <b>1.66</b>     |
| <b>3</b>                                | <b>2.56</b>     |

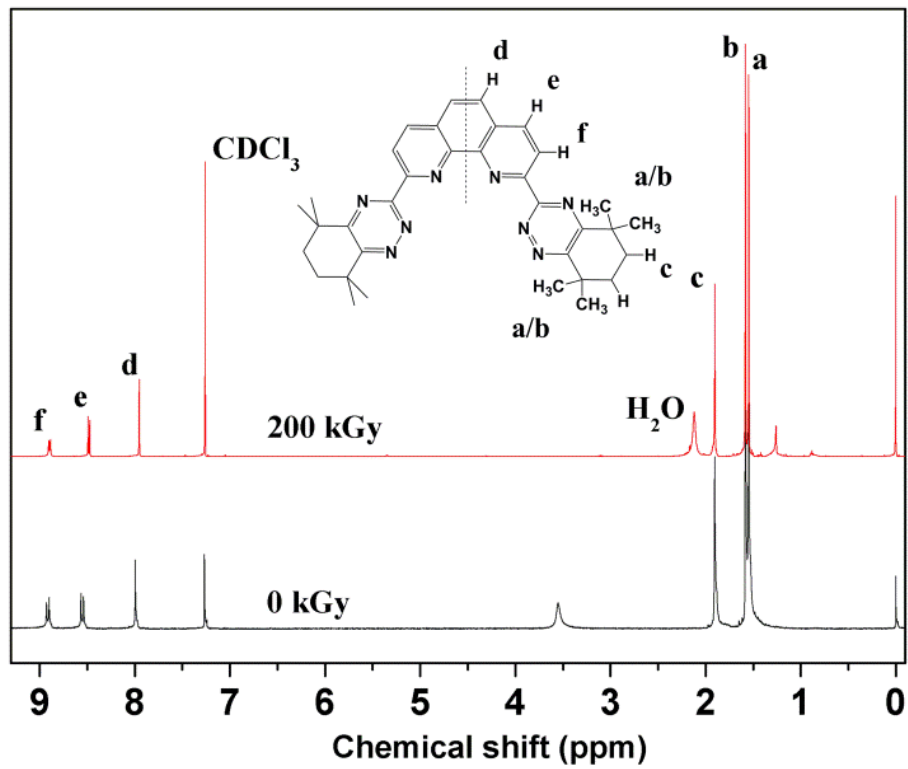

Fig. S2 <sup>1</sup>H NMR spectra of BTPhen before and after irradiation.

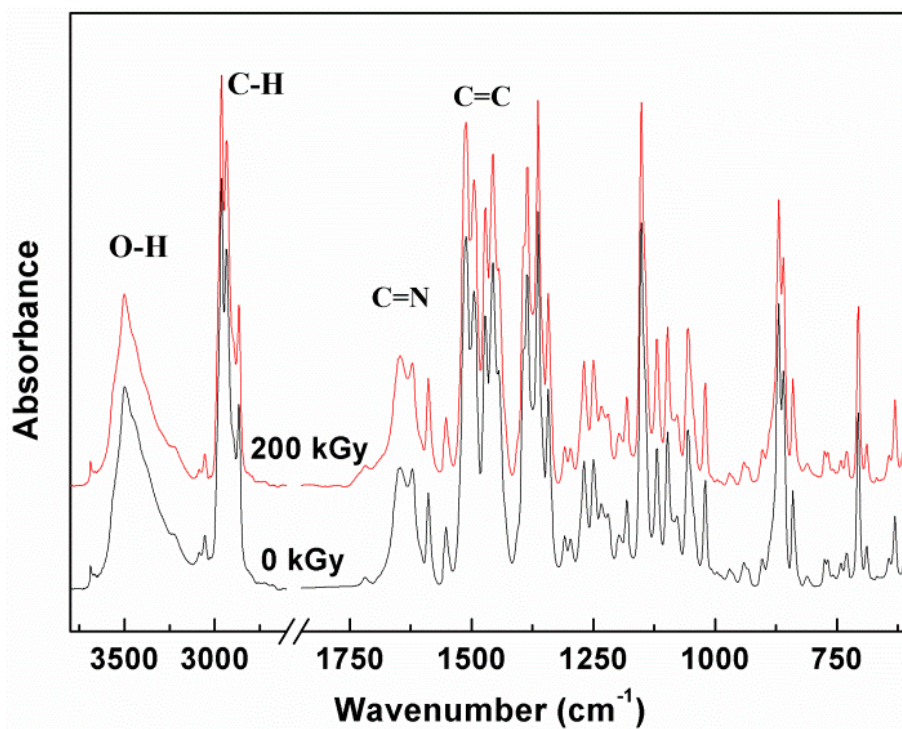

Fig. S3 Micro-FTIR spectra of BTPPhen before and after irradiation.

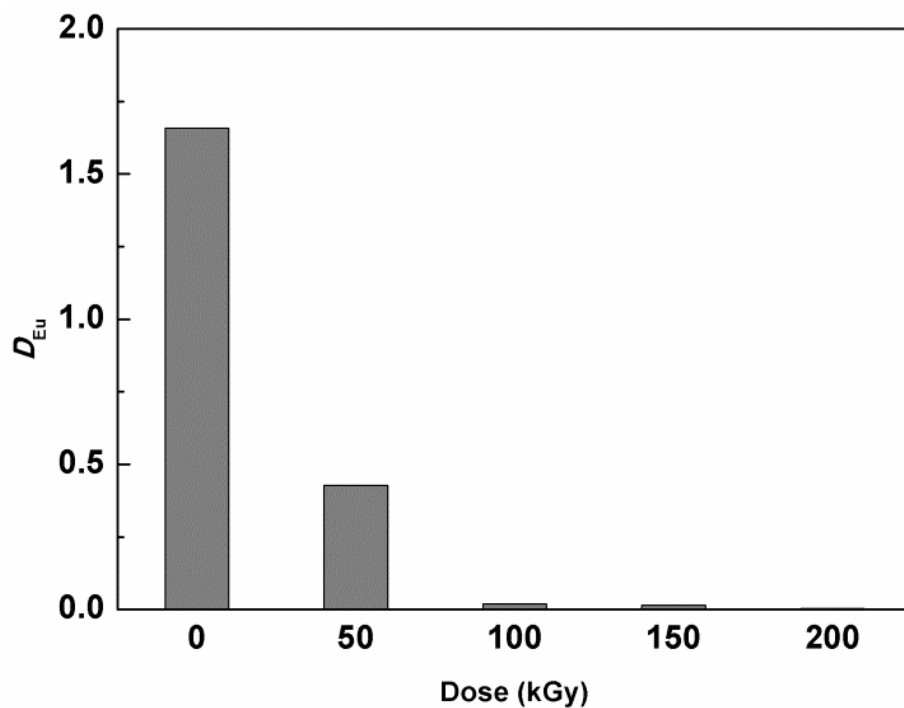

Fig. S4. Influence of  $\gamma$ -radiation on the  $D_{Eu}$  in BTPPhen/1-octanol system. Initial nitric acid concentration: 1 M.

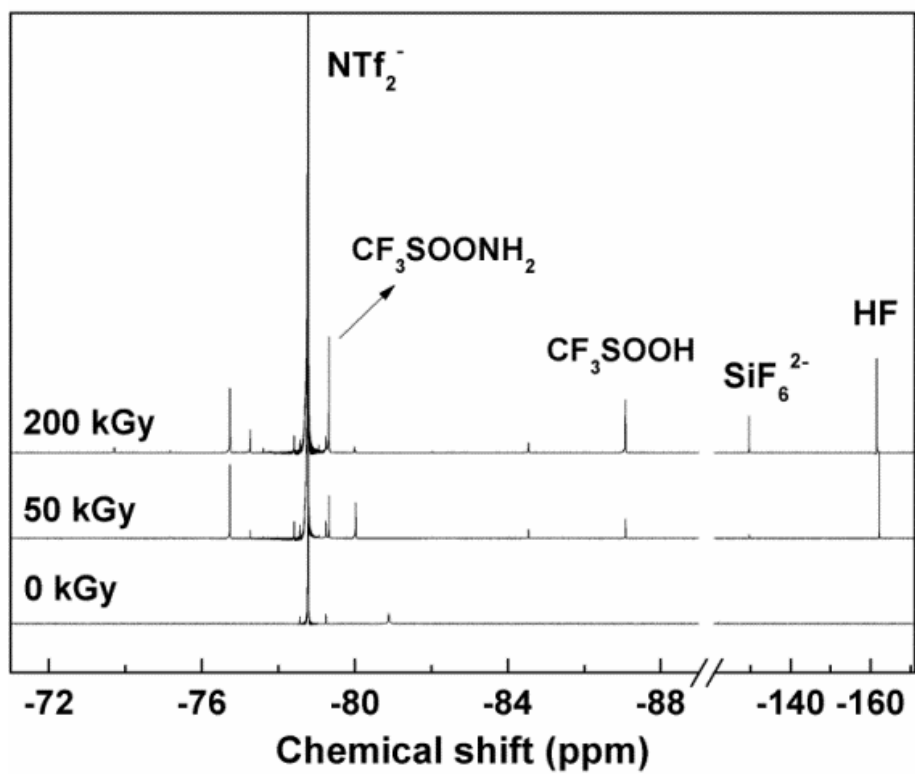

Fig. S5  $^{19}\text{F}$  NMR spectra of  $[\text{C}_2\text{mim}][\text{NTf}_2]$  before and after irradiation.



Table S4. Core level binding energy for sediment,  $\text{Eu}_2(\text{SO}_3)_3$  and  $\text{EuF}_3$

| Core level | Binding energy (eV) |                              |                |
|------------|---------------------|------------------------------|----------------|
|            | Sediment            | $\text{Eu}_2(\text{SO}_3)_3$ | $\text{EuF}_3$ |
| O 1s       | 531.69              | 531.24                       | –              |
| F 1s       | 684.67              | –                            | 684.19         |
| S 2p       | 168.85              | 167.33                       | –              |
| Eu 4d      | 136.90              | 136.62                       | 136.57         |
